1 **A first-in-class inhibitor of parasite FtsH disrupts plastid biogenesis in human**  
2 **pathogens**

3  
4 Katherine Amberg-Johnson<sup>1,3</sup>, Suresh M. Ganesan<sup>4</sup>, Hernan A. Lorenzi<sup>5</sup>, Jacquin C.  
5 Niles<sup>4</sup>, Ellen Yeh<sup>1,2,3,\*</sup>

6  
7 <sup>1</sup>Department of Biochemistry, <sup>2</sup>Pathology, and <sup>3</sup>Microbiology and Immunology, Stanford  
8 Medical School

9 <sup>4</sup>Department of Biological Engineering, Massachusetts Institute of Technology

10 <sup>5</sup>Department of Infectious Disease, The J. Craig Venter Institute

11 \*Corresponding author

12  
13 **There is an urgent need for antimalarials with distinct mechanisms-of-action to**  
14 **combat resistance to frontline drugs. The malaria parasite *Plasmodium falciparum***  
15 **and related apicomplexan pathogens contain an essential, non-photosynthetic**  
16 **plastid organelle, the apicoplast<sup>1,2</sup>, which is a key antiparasitic target. Despite its**  
17 **biomedical potential, broadly effective antimalarials targeting the apicoplast have**  
18 **been elusive due to the slow onset-of-action of drugs that inhibit apicoplast**  
19 **translation<sup>3,4</sup> and the apicoplast's limited metabolic function in the symptomatic**  
20 **stage of *Plasmodium*<sup>5</sup>. Apicoplast biogenesis depends on novel, but largely cryptic,**  
21 **mechanisms for protein/lipid import and organelle inheritance during parasite**  
22 **replication<sup>6,7</sup>. These critical pathways present untapped opportunities to discover**  
23 **new parasite-specific drug targets. We used an innovative chemical rescue screen<sup>5</sup> to**  
24 **identify the natural product antibiotic, actinonin<sup>8</sup>, as a first-in-class antimalarial**  
25 **compound inhibiting apicoplast biogenesis. Both chemical-genetic interaction and**  
26 **resistant mutation indicated that the unexpected target of actinonin in *P. falciparum***  
27 **and *Toxoplasma gondii* is FtsH1, a homolog of a bacterial membrane AAA**  
28 **metalloprotease. We show that *PfFtsH1* is essential for apicoplast biogenesis and**  
29 **parasite replication, making it the first apicomplexan-specific regulator of organelle**  
30 **biogenesis to be identified in a forward screen. Taken together, our findings**  
31 **demonstrate that FtsH1 is a novel and, importantly, druggable antimalarial target.**  
32 **Development of actinonin derivatives as FtsH1 inhibitors will have significant**  
33 **advantages over existing apicoplast-targeting compounds with improved drug**  
34 **kinetics, lower potential for clinical resistance, and multistage efficacy against**  
35 **multiple human parasites.**

36  
37 Because our molecular understanding of apicoplast biogenesis is limited, we performed a  
38 chemical screen to identify compounds that disrupt apicoplast biogenesis. Out of >400  
39 antimalarial compounds tested (Extended Data Table 1)<sup>9,10</sup>, we identified a single natural  
40 product antibiotic, actinonin<sup>8</sup>, as a novel inhibitor of apicoplast biogenesis. Previously we  
41 demonstrated that biosynthesis of the isoprenoid precursor, isopentenyl pyrophosphate  
42 (IPP), is the sole essential function of the apicoplast in blood-stage *P. falciparum*<sup>5</sup>. As  
43 such, compounds that target the apicoplast cause parasite growth inhibition that is fully  
44 rescued by the addition of IPP in the growth media. Actinonin caused *P. falciparum*  
45 growth inhibition in a single replication cycle (EC<sub>50</sub> = 3.2 μM; 95% CI 2.49-4.13) that  
46 was rescued by IPP (EC<sub>50</sub> = 60.7 μM; 95% CI 49.6-74.5), demonstrating that it

47 specifically inhibits the apicoplast with clinically-relevant kinetics (Fig. 1a; Extended  
48 Data Fig. 1a; Extended Data Table 1). In contrast, current drugs that inhibit translation in  
49 the apicoplast cause a characteristic “delayed death” after two replication cycles *in vitro*  
50 that limits their antimalarial efficacy and clinical use<sup>3</sup>. When we assessed parasite growth  
51 inhibition and apicoplast defects caused by one of these known apicoplast drugs,  
52 chloramphenicol, (Extended Data Fig. 1b and 2a,c) actinonin clearly had more rapid  
53 antimalarial activity.

54  
55 Furthermore, actinonin-treated *P. falciparum*, rescued for growth with IPP, no longer  
56 replicated their apicoplast and produced daughter parasites lacking apicoplasts, consistent  
57 with a defect in apicoplast biogenesis<sup>5</sup> (Fig. 1b-c, Extended Data Fig. 2a,e). Again, this  
58 inhibition phenotype contrasts with that of inhibitors known to disrupt MEP isoprenoid  
59 precursor biosynthesis in the apicoplast<sup>5,9,11</sup>. When we assessed the inhibition phenotype  
60 of fosmidomycin, a MEP inhibitor that is in clinical trials for antimalarial treatment, it  
61 also showed single-cycle antimalarial activity rescued by IPP (Extended Data Fig. 1b).  
62 Notably, though, fosmidomycin did not cause apicoplast loss (Extended Data Fig 2a,d).  
63 Taken together, actinonin’s inhibition phenotype distinguishes it from known inhibitors  
64 that disrupt apicoplast translation and metabolism (Extended Data Fig 1b and 2) and  
65 indicates that it has a novel mechanism-of-action.

66  
67 To further elucidate its mechanism-of-action, we first took a candidate-based approach to  
68 identify its target. Actinonin potently inhibits the bacterial and mitochondrial peptide  
69 deformylase (PDF), an enzyme that co-translationally removes the formyl group from the  
70 initiator methionine<sup>12</sup>. Because the apicoplast translation machinery is prokaryotic in  
71 origin and contains a PDF, we tested whether the apicoplast PDF is the target of  
72 actinonin<sup>13</sup>. In mitochondria, translation inhibitors suppress the effects of actinonin since  
73 translation is upstream of PDF activity<sup>14</sup>. Surprisingly, apicoplast translation inhibition  
74 did not suppress the effects of actinonin (Extended Data Fig. 3), suggesting apicoplast  
75 PDF is not the target of actinonin.

76  
77 We next took an unbiased approach to identify the target of actinonin by attempting to  
78 isolate actinonin-resistant *P. falciparum* but were unsuccessful using multiple selection  
79 methods, including chemical mutagenesis of the starting population. Instead we turned to  
80 *Toxoplasma gondii*, a related apicomplexan parasite, because it is easier to grow to large  
81 numbers and to genetically modify. As in *P. falciparum*, actinonin treatment caused  
82 growth inhibition (EC<sub>50</sub>= 13.7 μM; 95% CI 13.2-14.2; Extended Data Fig 4) and  
83 apicoplast loss<sup>15</sup> (Fig. 2a) in *T. gondii*, suggesting a similar mechanism-of-action. We  
84 selected for actinonin-resistant *T. gondii* and determined the whole-genome sequences for  
85 eight independently selected clones (Fig. 2b). Five of these clones harbored a N805S  
86 mutation in the metalloprotease domain of the membrane AAA protease *TgFtsH1*  
87 (TGGT1\_259260) (Fig. 2d; Extended Data Table 2). *TgFtsH1* was compelling for two  
88 reasons. First, *TgFtsH1* localizes to the apicoplast<sup>16</sup>. Second, actinonin is a peptide  
89 mimetic containing a metal-binding hydroxamic acid, a class of molecules that typically  
90 binds metalloproteases<sup>12,17</sup>. Confirming this resistance mutation, replacement of the  
91 endogenous *TgFtsH1(WT)* locus with the allele encoding *TgFtsH1(N805S)* was sufficient  
92 to confer actinonin resistance in *T. gondii* (Fig. 2c). The increased actinonin EC<sub>50</sub> in this

93 mutant was similar to that measured for the actinonin-resistant clones that arose  
94 following drug selection. Taken together, the known metalloprotease binding of  
95 actinonin, the predicted metalloprotease activity of TgFtsH1, and the validated actinonin-  
96 resistant mutation in *TgFtsH1* support FtsH1 as the target of actinonin in *T. gondii*,  
97 providing a strong candidate for validation in *P. falciparum*.

98  
99 The *P. falciparum* genome contains three FtsH homologs (Pf3D7\_1119600,  
100 Pf3D7\_1239700, and Pf3D7\_1464900). One of these, *PfFtsH1* (Pf3D7\_1239700) is  
101 most closely related to *TgFtsH1* by phylogenetic analysis<sup>18</sup>. Unlike *TgFtsH1*, *PfFtsH1*  
102 was previously reported to localize to the mitochondria, not the apicoplast<sup>18</sup>. However the  
103 same study reported that *PfFtsH1* undergoes internal cleavage, such that the localization  
104 of the N-terminal fragment containing the ATPase and protease domains was unclear.  
105 Setting aside its ambiguous localization, we sought to determine whether *PfFtsH1* is  
106 required for apicoplast biogenesis and the relevant target of actinonin. We constructed a  
107 *P. falciparum* strain in which the endogenous *PfFtsH1* locus was modified with a C-  
108 terminal FLAG epitope and 3' UTR tetR-DOZI-binding aptamer sequences to regulate its  
109 expression<sup>19</sup>. As expected, *PfFtsH1* expression was downregulated when the tetR-DOZI  
110 repressor bound the aptamer sequences, and restored when anhydrotetracycline, which  
111 disrupts this interaction, was added (Fig. 3a, Extended Data 5).

112  
113 To test whether *PfFtsH1* is essential for apicoplast biogenesis, we downregulated  
114 *PfFtsH1* and observed a nearly 4-fold decrease in parasitemia after 3 replication cycles,  
115 compared to parasites expressing normal levels of *PfFtsH1* (Fig 3b, Extended Data Fig.  
116 6a). This growth defect observed after multiple replication cycles is weaker than the  
117 single-cycle growth inhibition observed upon actinonin treatment and likely reflects  
118 partial knockdown, which has been reported using this tet-regulation system (personal  
119 communication, Dan Goldberg). Significantly, growth of *PfFtsH1* knockdown parasites  
120 was restored by addition of IPP, indicating *PfFtsH1* is essential specifically for an  
121 apicoplast function (Fig 3b, Extended Data 6a). Finally, we confirmed that loss of  
122 *PfFtsH1* led to apicoplast loss. Using qPCR for genes in the apicoplast and nuclear  
123 genome, we observed a steady decrease in the apicoplast:nuclear genome ratio upon  
124 knockdown of *PfFtsH1* and growth rescue with IPP compared to control parasites,  
125 consistent with loss of the apicoplast<sup>5</sup> (Fig. 3c). These results demonstrate that *PfFtsH1* is  
126 essential and required for apicoplast biogenesis, making it the first protein with a novel  
127 function in apicoplast biogenesis identified in an unbiased screen.

128  
129 Finally, because knockdown of *PfFtsH1* phenocopies the apicoplast biogenesis defect of  
130 actinonin, we determined whether knockdown of *PfFtsH1* sensitized parasites to  
131 actinonin. Indeed, when *PfFtsH1* expression was downregulated, the actinonin EC<sub>50</sub>  
132 decreased >50-fold compared to control parasites (Fig. 3d). Since these growth inhibition  
133 assays were performed over a single replication cycle, the downregulation of *PfFtsH1* did  
134 not significantly affect parasite growth, and the actinonin EC<sub>50</sub> could be measured  
135 without confounding growth inhibition caused by the decrease in *PfFtsH1* levels (Fig. 3b,  
136 Extended Data Fig. 6b). Importantly, *PfFtsH1* downregulation did not change the EC<sub>50</sub> of  
137 fosmidomycin, indicating that the hypersensitivity to actinonin after *PfFtsH1*  
138 downregulation is not due to general apicoplast disruption or parasite death (Extended

139 Data Fig. 6c). Combined with the target identification in *T. gondii*, this chemical-genetic  
140 interaction strongly implicates FtsH1 as the target of actinonin in apicomplexan parasites.

141  
142 Our study represents a rare example of a forward screen to uncover cryptic cellular  
143 pathways in *Plasmodium*<sup>20,21</sup>. Acquired by secondary endosymbiosis of an alga, the  
144 apicoplast is evolutionarily distinct. Apicomplexan FtsH1's role in organelle biogenesis  
145 is not conserved in homologs found in mitochondria or primary chloroplasts<sup>22</sup> and likely  
146 represents a novel pathway unique to secondary endosymbionts in this parasite  
147 lineage<sup>7,15,23,24</sup>. Based on the critical function of FtsH homologs in membrane protein  
148 quality control and complex assembly<sup>22</sup>, we propose that FtsH1 regulates the proteolysis  
149 of key apicoplast membrane protein(s) during parasite replication. FtsH1 offers a rare  
150 foothold into a novel apicoplast biogenesis pathway that will yield deeper insight into the  
151 molecular mechanisms of eukaryogenesis and uncover additional antiparasitic targets.

152  
153 Most importantly, our findings present an exciting opportunity for antimalarial drug  
154 discovery. FtsH1 inhibitors will have significant advantages over existing antimalarials  
155 that target apicoplast metabolism or translation. While metabolic needs vary throughout  
156 the parasite lifecycle and even between the same stage of different *Plasmodium*  
157 species<sup>25,26</sup>, apicoplast biogenesis is required at every proliferative stage of the parasite  
158 lifecycle and highly conserved among apicomplexan parasites. For example, apicoplast  
159 translation inhibitors which cause delayed biogenesis defects have broad clinical  
160 application as malaria prophylaxis targeting liver-stage *Plasmodium* spp and as a partner  
161 drug, in combination with faster-acting compounds, for acute parasitic diseases targeting  
162 blood-stage *Plasmodium* spp, *Toxoplasma gondii*, and *Babesia* spp. In fact, the utility of  
163 these antibiotics as antiparasitics would be greater if not for their slow activity. Inhibition  
164 of FtsH1 retains all the benefits of targeting apicoplast biogenesis with no delay in the  
165 onset-of-action. Moreover, our inability to select actinonin-resistant *Plasmodium*  
166 contrasts with the ready selection of *in vitro* resistance against antibiotics<sup>27</sup> and MEP  
167 inhibitors<sup>9,28,29</sup> and indicates a lower likelihood of clinical resistance to FtsH1 inhibitors.  
168 Finally, several clinical lead candidates based on the actinonin scaffold have advanced  
169 into human clinical trials as bacterial PDF inhibitors<sup>30</sup>. We are currently developing an  
170 FtsH1-based assay to facilitate high-throughput screening of actinonin derivatives with  
171 increased potency and improved drug properties as antimalarials. Overall, FtsH1  
172 inhibitors have potential for rapid onset, minimal clinical resistance, and multi-stage  
173 efficacy against multiple parasitic infections, and routes to identifying a clinical lead  
174 candidate are readily accessible.

175

## 176 **References**

177

- 178 1. McFadden, G. I., Reith, M. E., Munholland, J. & Lang-Unnasch, N. Plastid in human  
179 parasites. *Nature* **381**, 482 (1996).
- 180 2. Köhler, S. *et al.* A plastid of probable green algal origin in Apicomplexan  
181 parasites. *Science* **275**, 1485–1489 (1997).
- 182 3. Geary, T. G. & Jensen, J. B. Effects of antibiotics on *Plasmodium falciparum* in  
183 *vitro*. *Am. J. Trop. Med. Hyg.* **32**, 221–225 (1983).

- 184 4. Fichera, M. E. & Roos, D. S. A plastid organelle as a drug target in apicomplexan  
185 parasites. *Nature* **390**, 407–409 (1997).
- 186 5. Yeh, E. & DeRisi, J. L. Chemical Rescue of Malaria Parasites Lacking an Apicoplast  
187 Defines Organelle Function in Blood-Stage Plasmodium falciparum. *PLoS Biol* **9**,  
188 e1001138 (2011).
- 189 6. Waller, R. F. *et al.* Nuclear-encoded proteins target to the plastid in *Toxoplasma*  
190 *gondii* and *Plasmodium falciparum*. *Proc. Natl. Acad. Sci.* **95**, 12352–12357  
191 (1998).
- 192 7. Vaishnav, S. & Striepen, B. The cell biology of secondary endosymbiosis--how  
193 parasites build, divide and segregate the apicoplast. *Mol. Microbiol.* **61**, 1380–  
194 1387 (2006).
- 195 8. Gordon, J. J., Kelly, B. K. & Miller, G. A. Actinonin: an antibiotic substance  
196 produced by an actinomycete. *Nature* **195**, 701–702 (1962).
- 197 9. Wu, W. *et al.* A chemical rescue screen identifies a *Plasmodium falciparum*  
198 apicoplast inhibitor targeting MEP isoprenoid precursor biosynthesis.  
199 *Antimicrob. Agents Chemother.* AAC.03342-14 (2014). doi:10.1128/AAC.03342-  
200 14
- 201 10. Goodman, C. D. & McFadden, G. I. Ycf93 (Orf105), a small apicoplast-encoded  
202 membrane protein in the relict plastid of the malaria parasite *Plasmodium*  
203 *falciparum* that is conserved in Apicomplexa. *PloS One* **9**, e91178 (2014).
- 204 11. Jomaa, H. *et al.* Inhibitors of the nonmevalonate pathway of isoprenoid  
205 biosynthesis as antimalarial drugs. *Science* **285**, 1573–1576 (1999).
- 206 12. Chen, D. Z. *et al.* Actinonin, a naturally occurring antibacterial agent, is a potent  
207 deformylase inhibitor. *Biochemistry (Mosc.)* **39**, 1256–1262 (2000).
- 208 13. Bracchi-Ricard, V. *et al.* Characterization of an eukaryotic peptide deformylase  
209 from *Plasmodium falciparum*. *Arch. Biochem. Biophys.* **396**, 162–170 (2001).
- 210 14. Richter, U. *et al.* A Mitochondrial Ribosomal and RNA Decay Pathway Blocks Cell  
211 Proliferation. *Curr. Biol.* **23**, 535–541 (2013).
- 212 15. van Dooren, G. G. *et al.* A novel dynamin-related protein has been recruited for  
213 apicoplast fission in *Toxoplasma gondii*. *Curr. Biol. CB* **19**, 267–276 (2009).
- 214 16. Karnataki, A., Derocher, A. E., Coppens, I., Feagin, J. E. & Parsons, M. A membrane  
215 protease is targeted to the relict plastid of *Toxoplasma* via an internal signal  
216 sequence. *Traffic Cph. Den.* **8**, 1543–1553 (2007).
- 217 17. Ganji, R. J. *et al.* Structural basis for the inhibition of M1 family aminopeptidases  
218 by the natural product actinonin: Crystal structure in complex with *E. coli*  
219 aminopeptidase N. *Protein Sci. Publ. Protein Soc.* **24**, 823–831 (2015).
- 220 18. Tanveer, A. *et al.* An FtsH protease is recruited to the mitochondrion of  
221 *Plasmodium falciparum*. *PloS One* **8**, e74408 (2013).
- 222 19. Ganesan, S. M., Falla, A., Goldfless, S. J., Nasamu, A. S. & Niles, J. C. Synthetic RNA-  
223 protein modules integrated with native translation mechanisms to control gene  
224 expression in malaria parasites. *Nat. Commun.* **7**, 10727 (2016).
- 225 20. Arastu-Kapur, S. *et al.* Identification of proteases that regulate erythrocyte  
226 rupture by the malaria parasite *Plasmodium falciparum*. *Nat. Chem. Biol.* **4**, 203–  
227 213 (2008).
- 228 21. Hovlid, M. L. & Winzeler, E. A. Phenotypic Screens in Antimalarial Drug  
229 Discovery. *Trends Parasitol.* **32**, 697–707 (2016).



- 230 22. Janska, H., Kwasniak, M. & Szczepanowska, J. Protein quality control in  
231 organelles — AAA/FtsH story. *Biochim. Biophys. Acta BBA - Mol. Cell Res.* **1833**,  
232 381–387 (2013).
- 233 23. Moore, R. B. *et al.* A photosynthetic alveolate closely related to apicomplexan  
234 parasites. *Nature* **451**, 959–963 (2008).
- 235 24. Spork, S. *et al.* An Unusual ERAD-Like Complex Is Targeted to the Apicoplast of  
236 *Plasmodium falciparum*. *Eukaryot. Cell* **8**, 1134–1145 (2009).
- 237 25. Srivastava, A. *et al.* Stage-Specific Changes in *Plasmodium* Metabolism Required  
238 for Differentiation and Adaptation to Different Host and Vector Environments.  
239 *PLoS Pathog.* **12**, e1006094 (2016).
- 240 26. Shears, M. J., Botté, C. Y. & McFadden, G. I. Fatty acid metabolism in the  
241 *Plasmodium* apicoplast: Drugs, doubts and knockouts. *Mol. Biochem. Parasitol.*  
242 **199**, 34–50 (2015).
- 243 27. Sidhu, A. B. S. *et al.* In vitro efficacy, resistance selection, and structural modeling  
244 studies implicate the malarial parasite apicoplast as the target of azithromycin. *J.*  
245 *Biol. Chem.* **282**, 2494–2504 (2007).
- 246 28. Dharia, N. V. *et al.* Use of high-density tiling microarrays to identify mutations  
247 globally and elucidate mechanisms of drug resistance in *Plasmodium falciparum*.  
248 *Genome Biol.* **10**, R21 (2009).
- 249 29. Guggisberg, A. M. *et al.* A sugar phosphatase regulates the methylerythritol  
250 phosphate (MEP) pathway in malaria parasites. *Nat. Commun.* **5**, 4467 (2014).
- 251 30. Sangshetti, J. N., Khan, F. A. K. & Shinde, D. B. Peptide deformylase: a new target  
252 in antibacterial, antimalarial and anticancer drug discovery. *Curr. Med. Chem.* **22**,  
253 214–236 (2015).

254

## 255 **Methods**

256

### 256 **Chemicals**

257

257 Fosmidomycin was purchased from Santa Cruz Biotechnology and 10mM aliquots were  
258 prepared in water. Chloramphenicol was purchased from Sigma Aldrich and 50mM  
259 aliquots were prepared in 100% ethanol. Actinonin was purchased from Sigma Aldrich  
260 and 25mM aliquots were prepared in 100% ethanol. Anhydrotetracycline was purchased  
261 from Sigma and 2.5mM aliquots prepared in 100% ethanol and used at a final  
262 concentration of 0.5uM.

263

264 Enoxacin, ciprofloxacin, levofloxacin, norfloxacin, novobiocin, coumeramycin,  
265 mericitabine, 2'-deoxy-2-F-cytidine, gemcitabine, ADEP1a, beta-lactone 4, beta-lactone  
266 7, and rifampin were acquired and solubilized as noted in Supplementary Table 1.

267

268 Isopentenyl pyrophosphate (IPP) was purchased from Isoprenoids LC and stored at 2  
269 mg/mL in 70% methanol, 30% 10mM ammonium hydroxide at -80C. To prevent  
270 methanol toxicity, aliquots of IPP were dried in the speed vacuum centrifuge before  
271 adding to cultures. All drugs were stored at -20C and resuspended just prior to use.

272

### 273 ***Plasmodium falciparum* culture and transfections**

274

274 *P. falciparum* D10 (MRA-201), and D10 ACP<sub>L</sub>-GFP (MRA-568) were obtained from

275

275 MR4. *P. falciparum* NF54<sup>attB</sup> was a gift from David Fidock (Columbia University). NF54

276 <sup>attB</sup> strain constitutively expressing Cas9 and T7 Polymerase, generated previously<sup>31</sup>, was  
277 used in this study. Parasites were maintained in human erythrocytes (2% hematocrit) in  
278 RPMI 1640 media supplemented with 0.25% Albumax II (GIBCO Life Technologies), 2  
279 g/L sodium bicarbonate, 0.1 mM hypoxanthine, 25 mM HEPES (pH 7.4), 50 µg/L  
280 gentamycin, and 0.4% glucose at 37°C, 5% O<sub>2</sub>, and 5% CO<sub>2</sub>.

281  
282 Parasites were transfected using methods already published<sup>21</sup>. Briefly, we used 50 µg of  
283 plasmid per 200 µL packed red blood cells (RBCs) adjusted to 50% hematocrit. We used  
284 a Bio-Rad Gene Pulser II to preload uninfected RBCs using eight square-wave pulses of  
285 365 V for 1 ms, separated by 100 ms. Preloaded RBCs were resealed for 1 hour at 37C  
286 and washed twice in RPMI to remove lysed cells. Schizont stage parasites at 0.5%  
287 parasitemia were then allowed to invade half of the preloaded RBCs during two  
288 sequential reinvasions. Media was changed daily for the first 12 days and every other day  
289 thereafter. Parasites were split 1:1 into fresh blood every 4 days until parasites were  
290 visible by Giemsa smear. To select for integration of the pFtsH1 into *P. falciparum*  
291 NF54<sup>attB-pFtCRISPR</sup> parasites, transfected parasites were maintained in media containing 5  
292 nM WR99210 and 0.5 µM anhydrotetracycline (Sigma) and then selected with 2.5 mg/l  
293 Blasticidin S (Sigma) beginning 4 days after transfection.

294

#### 295 ***Toxoplasma gondii* culture and transfection**

296 *T. gondii* RH and *T. gondii* RH  $\Delta ku80\Delta hxp1$  strains were a gift from Matthew Bogyo  
297 (Stanford University) and maintained by passage through confluent monolayers of human  
298 foreskin fibroblasts (HFFs) host cells. HFFs were cultured in DMEM (Invitrogen)  
299 supplemented with 10% FBS (Fetal Plex Animal Serum from Gemini), 2mM L-  
300 glutamine (Gemini), and 100 µg penicillin and 100 µg streptomycin per mL (Gibco Life  
301 Technologies), maintained at 37 C and 5% CO<sub>2</sub>. Parasites were harvested for assays by  
302 syringe lysis of infected HFF monolayers.

303

304 For transfection of *T. gondii*  $\Delta ku80\Delta hxp1$ , 15µg of the pTgCRISPR plasmid was  
305 combined with 3 µg of the pFtsH1N805S or pFtsH1WT that had been linearized by NotI  
306 digestion. Approximately 10<sup>7</sup> parasites were released from host cells using syringe lysis  
307 and washed into 400µL of cytomix containing both plasmids. Parasites were  
308 electroporated (BTX Electro Cell Manipulator 600) with 1.2-1.4 kV, 2.5kV/resistance, R2  
309 (24 ohm) and then allowed to recover in the cuvette at room temperature for 10 mins  
310 before adding to host cells. After 24 hours, media containing 25µg/mL mycophenolic  
311 acid (Sigma) and 50 µg/mL xanthine (Sigma) was added to select for transfectants. After  
312 a week, plaques were observed and single clones were isolated using limiting dilution.

313

#### 314 ***Toxoplasma gondii* genome sequencing and SNP identification**

315 Actinonin resistant and susceptible *T. gondii* were grown on 15 cm dishes containing  
316 confluent HFF monolayers until spontaneous lysis of the monolayer was achieved.  
317 Released parasites were collected and filtered through 5 micrometer syringe filters  
318 (Millipore) before isolating DNA (Qiagen DNAeasy Blood & Tissue).

319

320 *T. gondii* genomic DNA isolated from either the parental *T. gondii* RH strain  
321 (SRR3666219) or any of its derived mutants (SRR3666219, SRR3666222, SRR3666224,

322 SRR3666792, SRR3666794, SRR3666796, SRR3666798, SRR3666799, SRR3666801)  
323 was sequenced in an Illumina NextSeq apparatus using 2x150bp reads at an average  
324 sequencing depth of 35x. Sequencing reads were quality trimmed and remnants of  
325 sequencing adaptors removed with *trimmomatic* (PMID:24695404). Next, reads were  
326 mapped to the reference nuclear assembly of the *T. gondii* GT1 strain (ToxoDB v13.0)  
327 and the apicoplast genome assembly from the RH strain (NC\_001799) with the program  
328 *bowtie2* (PMID:25621011). Duplicated aligned reads were removed with *picard tools*  
329 (<http://broadinstitute.github.io/picard>) and reads spanning InDels were realigned with  
330 GATK (PMID:20644199). Afterwards, allelic variants were called with *samtools mpileup*  
331 (PMID:19505943) followed by *bcftools call* with *-p* set to 0.05 (PMID:26826718).  
332 Finally, classification of mutations was performed with *snpEff* (PMID:22728672).  
333

### 334 **Growth inhibition assays**

335 For *P. falciparum* EC<sub>50</sub> calculations, growth assays were performed in 96 well plates  
336 containing serial dilution of drugs in triplicate. Media was supplemented with 200 uM  
337 IPP as indicated. Growth was initiated with ring-stage parasites (synchronized with 5%  
338 sorbitol treatment 48 hours prior) at 1% parasitemia and 1% hematocrit. To calculate  
339 growth, cultures were incubated for 72h and growth was then terminated by incubation  
340 with 1% formaldehyde (Electron Microscopy Services) for 30 minutes at room  
341 temperature. Parasitized cells were stained with 50 nM YOYO-1 (Invitrogen) overnight  
342 at room temperature and the parasitemia was determined by flow cytometry (BD Accuri  
343 C6 Sampler). Data were analyzed by BD Accuri C6 Sampler software.  
344

345 For *T. gondii* EC<sub>50</sub> calculations, plaque assays were performed in 24 well plates  
346 containing confluent HFF monolayers serial dilutions of drugs in duplicate.  
347 Approximately 50 parasites were counted using flow cytometry and added to each well.  
348 After incubating for 6 days, infected monolayers were washed, fixed with methanol for  
349 10 minutes, stained with 2% crystal violet (Sigma) for 30 minutes, and then washed  
350 again. Plaques were visualized as non-stained areas. The area of each plaque in a given  
351 well was measured and summed using ImageJ as a proxy for growth and normalized to  
352 the vehicle only control.  
353

354 For measuring the growth inhibition of *P. falciparum* during the time course, 10 uM  
355 actinonin, 10 uM fosmidomycin, 30 uM chloramphenicol, 200 uM IPP, and 0.5 uM of  
356 anhydrotetracycline was used as necessary. For comparison of growth between different  
357 treatment conditions, cultures were carried simultaneously and handled identically with  
358 respect to media changes and addition of blood cells. Daily samples were collected and  
359 fixed with 1% formaldehyde for 30 minutes at RT. At the end of the time course, all  
360 samples were stained with 50 nM YOYO-1 and parasitemia was measured using flow  
361 cytometry. All growth curves were plotted using GraphPad Prism.  
362

363 For measuring the growth inhibition of *T. gondii* during the time course, 6-well plates  
364 were set up with no drug, 40 uM actinonin, 25 nM clindamycin, and 4 uM  
365 pyrimethamine. *T. gondii* was added at a MOI = 3. Every 12 hours, parasites were  
366 released from HFFs using syringe lysis and counted using flow cytometry (BD Accuri C6  
367 Sampler). After 36 hours, spontaneous lysis of the monolayer was observed and parasites



368 were counted using flow cytometry and then added back to fresh monolayers at MOI = 3  
369 in the absence of drug and parasites were counted every 12 hours as before.

370

371 For co-treatments of *P. falciparum* with actinonin and chloramphenicol, 96 well plates  
372 containing ring stage parasites at 1% parasitemia and 1% hematocrit were treated with  
373 serial dilutions of both actinonin and chloramphenicol alone and in combination. To  
374 determine the effect on growth after one lytic cycle, parasites were fixed at 72h and  
375 parasitemia was measured by flow cytometry as above. To determine the effect on  
376 growth after two lytic cycles, 75% of the media was exchanged at 72 hours and plates  
377 were incubated for an additional 48 hours following fixation and flow cytometry as  
378 above. Media was supplemented with 200 uM IPP as a separate control to insure  
379 specificity of the drug at the concentrations used.

380

### 381 **Quantitative Real-Time PCR**

382 Parasites from 1 mL of *P. falciparum* culture at ring stage were isolated by saponin lysis  
383 followed by two washes with PBS. DNA was purified using DNAeasy Blood & Tissue  
384 (Qiagen). Primers were designed to target genes found on the apicoplast or nuclear  
385 genome: *tufA* (apicoplast) 5'-GATATTGATTCAGCTCCAGAAGAAA-3' and *CHT1*  
386 (nuclear) 5'-TGTTTCCTTCAACCCCTTTT-3' /5'-TGTTTCCTTCAACCCCTTTT-3'.  
387 Reactions contained template DNA, 0.15 uM of each primer, and 1x SYBR Green I  
388 Master mix (Roche). qPCR reactions were performed at 56C primer annealing and 65C  
389 template extension for 35 cycles on a Applied Biosystem 7900HT system. Relative  
390 quantification of target genes was determined<sup>32</sup>. For each time point, the  
391 apicoplast:nuclear genome ratio was calculated relative to the appropriate control  
392 collected at the same time.

393

### 394 **Fluorescence Microscopy**

395 *P. falciparum* D10 ACP(L)-GFP parasites diluted to 0.05% hematocrit were settled on a  
396 Lab-Tek II Chambered Coverglass (Thermo Fisher) and incubated in 2 ug/mL Hoescht  
397 33342 stain for 15 minutes at 37C. Widefield epifluorescence live cell images were  
398 acquired with an Olympus IX70 microscope. The microscope was outfitted with a  
399 Deltavision Core system (Applied Precision) using an Olympus x60 1.4NA Plan Apo  
400 Lens, a Sedat Quad filter set (Semrock) and a CoolSnap HQ CCD Camera  
401 (Photometrics). The microscope was controlled and images were deconvolved via  
402 softWoRx 4.1.0 software. ImageJ software was used to analyze resulting images.

403

404 Live microscopy of *T. gondii* RH FNR-RFP parasites<sup>36</sup> was performing using Lab-Tek II  
405 Chambered Coverglasses containing confluent HFF monolayers. Parasites were added at  
406 an MOI = 1. After 36 hours of incubation, parasites were incubated with 2 ug/mL of  
407 Hoescht for 15 minutes. Widefield epifluorescence live cell images were acquired with a  
408 Nikon Eclipse Ti inverted fluorescence microscope with a NA 1.40 oil-immersion  
409 objective (Nikon Instruments) and controlled using MicroManager v1.4. An iXon3 888  
410 EMCCD camera (Andor) was used for fluorescence imaging and an a Zyla 5.5 sCMOS  
411 camera (Andor) was used for phase contrast imaging. ImageJ software was used to  
412 analyze the resulting images.

413

#### 414 **Immunoblot**

415 Parasites from 9 mL of *P. falciparum* culture were isolated by saponin lysis, washed with  
416 PBS and resuspended in 1 x NuPAGE LDS sample buffer (Invitrogen). Proteins were  
417 separated by electrophoresis on 4-12% Bis-Tris gel (Invitrogen) and transferred to a  
418 nitrocellulose membrane. After blocking, membranes were probed with 1:2000  
419 monoclonal mouse anti-FLAG M2 (Sigma) and 1:10,000 IRDye 680RD goat anti-mouse  
420 IgG (LiCor Bioscience). Fluorescence antibody-bound proteins were detected with  
421 Odyssey Imager at 700 nm (LiCor Biosciences).

422

#### 423 ***Toxoplasma gondii* resistance selection**

424 Approximately  $2 \times 10^6$  *T. gondii* RH parasites were added to T25s containing a  
425 confluent HFF monolayer and allowed to grow for 24 hours. To mutagenize, between  
426 500 uM – 2 mM N-ethyl N-nitrosourea (ENU) diluted in DMSO was added to flasks and  
427 incubated for 2 hours at 37 C. Cultures were then washed twice with 10mLs of cold PBS  
428 and then released from host cells using syringe lysis. A quarter of the resulting parasites  
429 were passaged to T25s containing a fresh monolayer of HFFs. After two passages,  
430 parasites were treated with 40uM actinonin. After one passage under actinonin selection,  
431 a severe bottleneck was observed. Plaques of resistant parasites could be observed after  
432 one week of constant actinonin pressure with periodic media changes. Finally, single  
433 clones were isolated using limiting dilution.

434

#### 435 ***Plasmodium falciparum* construct generation**

436 The primers used for generating different fragments are listed in the Extended Data Table  
437 3. A construct for regulating expression of FtsH1 (PF3D7\_1239700) in *P. falciparum*  
438 (pFtsH1) was generated from the parental pSN054, a modified pJazz linear plasmid  
439 (Extended Data Table 3). The left homology region was amplified from parasite genomic  
440 DNA using primers SMG476 and SMG 477 and was cloned using FseI and AsisI  
441 restriction sites. FtsH1 protein coding nucleotides 2348- 2643 were recoded using gene  
442 block (IDT) to remove the PAM site. The right homology region was amplified from  
443 parasite genomic DNA using primers SMG501 and SMG502. These fragments were  
444 cloned using the I-SceI restriction site. Targeting guide RNA was generated by klenow  
445 reaction using primers SMG514 and SMG515 and was inserted using the AflII site. All  
446 sequences were ligated into the parent plasmid using Gibson assembly. Constructs for  
447 regulation FtsH3 (PF3D7\_1464900) were generated similarly (SMG505 and SMG506 for  
448 the right homology region; SMG495 and SMG496 for the left homology region;  
449 SMG518 and SMG519 for the gRNA klenow reaction). While this construct could be  
450 generated, no parasites emerged after two transfections. Constructs for regulating FtsH2  
451 (PF3D7\_1119600) using primers SMG503 and SMG504 for the right homology region  
452 and SMG481 and SMG507 for the left homology region were unable to be generated  
453 because of unsuccessful PCR.

454

455

#### 456 ***Toxoplasma gondii* construct generation**

457 A construct for knocking in the FtsH1<sub>N805S</sub> allele into the endogenous loci of FtsH1  
458 (pFtsHN805S) was generated from the parental pTKO2 vector. Briefly, a ~800 bp  
459 sequence upstream of the TGGT1\_259260 start codon was amplified as the left

460 homology region (using primers KAJ1 and KAJ2). The FtsH<sub>N805S</sub> sequence was then  
461 amplified from actinonin resistant cDNA (using primers KAJ3 and KAJ4). The HXGPRT  
462 resistance cassette was amplified off of the pTKO2 cassette (using primers KAJ5 and  
463 KAJ6). A ~800 bp sequence downstream of the TGGT1\_259260 stop codon was  
464 amplified as the right homology region (using primers KAJ7 and KAJ8). To insert the  
465 right homology region, the pTKO2 plasmid was cut with HindIII and HpaI and the 800  
466 bp sequence was inserted using infusion (Clontech). To insert the left homology region  
467 and the FtsH<sub>N805S</sub> allele, the pTKO2 plasmid containing the downstream homology  
468 region was cut with NotI and EcoRI and the two PCR products were inserted also using  
469 infusion (Clontech). The resulting colonies were tested using a diagnostic HpaI digest  
470 and correct clones were subjected to Sanger sequencing of the inserts. To revert the  
471 pFtsHN805S construct to pFtsHWT, we used Q5 mutagenesis (NEB) and primers KAJ9  
472 and KAJ10.

473

474 To increase the transfection efficiency and specificity, CRISPR-Cas9 was used to insert a  
475 double stranded break at the site of insertion (the endogenous TGGT1\_259260 allele).  
476 Briefly, pSAG1::Cas9-U6::sgUPRT<sup>33</sup> was modified to contain a guide sequence specific  
477 to a FtsH1 intron using the Q5 mutagenesis kit (NEB) and primers KAJ11 and KAJ12.  
478 Sanger sequencing of the guide was used to verify the resulting plasmid.

479

480 31. Sidik, S. M. *et al.* A Genome-wide CRISPR Screen in *Toxoplasma* Identifies  
481 Essential Apicomplexan Genes. *Cell* **166**, 1423–1435.e12 (2016).

482

483 32. Pfaffl, M. W. A new mathematical model for relative quantification in real-time RT-  
484 PCR. *Nucleic Acids Res.* **29**, e45 (2001).

485

486 33. Shen, B., Brown, K. M., Lee, T. D. & Sibley, L. D. Efficient gene disruption in  
487 diverse strains of *Toxoplasma gondii* using CRISPR/CAS9. *mBio* **5**, e01114-01114  
488 (2014).

489

490 34. Camps, M. *et al.* A rRNA mutation identifies the apicoplast as the target for  
491 clindamycin in *Toxoplasma gondii*. *Mol Microbiol.* **5**, 1309-18 (2002).

492

493 35. Dahl, E.L., Rosenthal, P.J. Multiple antibiotics exert delayed effects against the  
494 *Plasmodium falciparum* apicoplast. *Antimicrob Agents Chemother.* **51**, 3485-90  
495 (2007).

496

497 36. Striepen, B. *et al.* The plastid of *Toxoplasma gondii* is divided by association with  
498 the centrosomes. *J Cell Biol.* **151**, 1423-1424 (2000).

499

## 500 Acknowledgements

501 We thank Katrina Hong for assistance in drug assays and Prof. Boris Striepen for  
502 providing the *T. gondii* FNR-RFP strain. This project has been funded with federal funds  
503 from the NIAID, NIGMS, and Director's Fund, National Institutes of Health, Department  
504 of Health and Human Services under Award Numbers 1K08AI097239 (EY),  
505 1DP5OD012119 (EY), U19AI110819 (HAL), 1DP2OD007124 (JCN), P50 GM098792

506 (JCN), and T32GM007276 (KAJ). Funding was also provided by the Burroughs-  
507 Wellcome Fund (EY), Bill and Melinda Gates Foundation (OPP1069759; JCN), and the  
508 Stanford Bio-X SIGF William and Lynda Steere Fellowship (KAJ).

509

### 510 **Author Information**

#### 511 **Affiliations**

512 Department of Biochemistry, Stanford Medical School, Stanford, California 94305

513 Katherine Amberg-Johnson, Ellen Yeh

514

515 Department of Pathology, Stanford Medical School, Stanford, California 94305

516 Ellen Yeh

517

518 Department of Microbiology & Immunology, Stanford Medical School, Stanford,

519 California, 94305

520 Katherine Amberg-Johnson, Ellen Yeh

521

522 Department of Biological Engineering, Massachusetts Institute of Technology,

523 Cambridge, Massachusetts, 02139

524 Suresh M. Ganesan, Jacquin C. Niles

525

526 Department of Infectious Disease, The J. Craig Venter Institute, Rockville, Maryland,

527 20850

528 Hernan A. Lorenzi

529

#### 530 **Contributions**

531 K.A-J. and E.Y. conceived and designed experiments. K.A-J. performed the majority of

532 the experiments. S.M.G. and J.C.N. designed and generated the FtsH1 knockdown

533 construct. H.A.L. performed the whole-genome sequencing and variant analysis. K.A-J.

534 and E.Y. analyzed the data and wrote the manuscript. All authors discussed and edited

535 the manuscript.

536

#### 537 **Competing financial interests**

538 The authors declare no competing financial interests.

539

#### 540 **Corresponding author**

541 Correspondence to: Ellen Yeh

542

543

544 **Fig 1: Actinonin inhibits apicoplast biogenesis in *P. falciparum***  
 545 **(a)** Time course of parasite growth during actinonin treatment with or  
 546 without IPP, normalized to control cultures with or without IPP as  
 547 appropriate. Error bars represent the SEM of two biological replicates.  
 548 **(b)** Time course of the apicoplast:nuclear genome ratio  
 549 measured by quantitative PCR (qPCR) using primers for the apicoplast and  
 550 nuclear genomes during treatment with actinonin and IPP. Genome ratios  
 551 were normalized to control parasites grown with IPP only. Error bars as in  
 552 **a**.  
 553 **(c)** Representative images of the apicoplast of IPP-rescued control and  
 554 actinonin treated parasites 24 hours after treatment during the schizont  
 555 stage. The apicoplast is visualized using the *P. falciparum* reporter strain  
 556 D10 ACP-GFP in which GFP is targeted to the apicoplast and the nucleus  
 557 is stained with Hoescht 33342. During *Plasmodium* replication, the  
 558 apicoplast starts as a single small spherical organelle (ring stage)  
 559 which branches and divides into multiple apicoplasts (schizont stage).  
 560 A punctate apicoplast that does not branch indicates a defect in apicoplast  
 561 biogenesis.  
 562  
 563  
 564  
 565  
 566  
 567  
 568  
 569

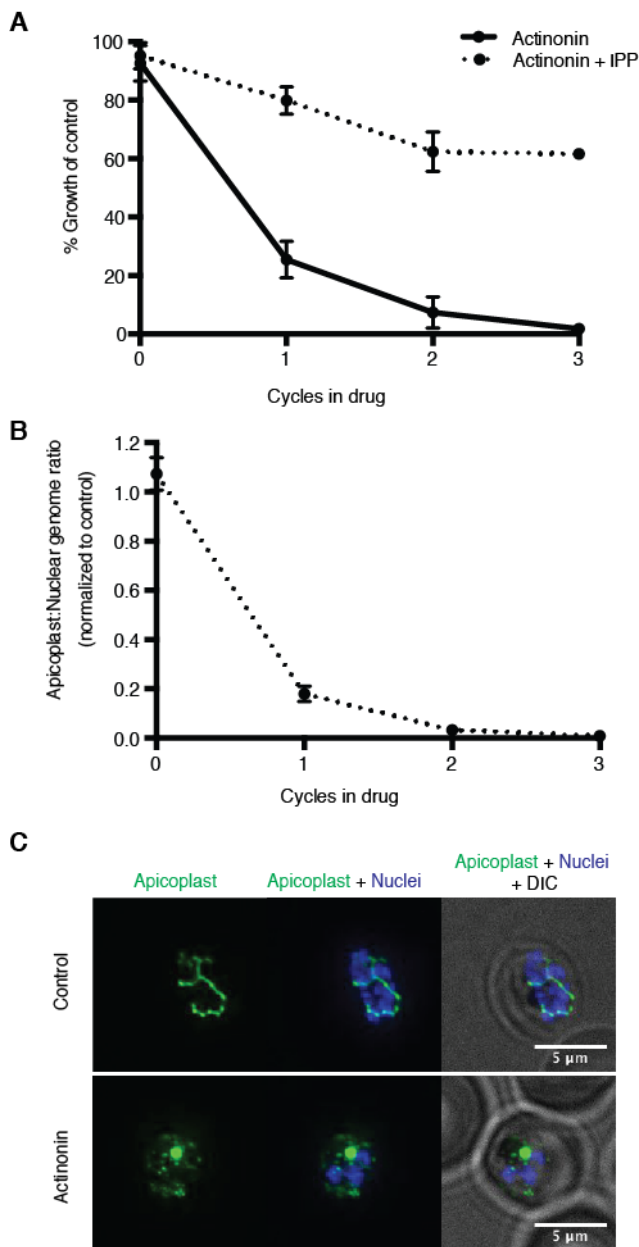



580 **Fig 2: A mutation in the protease domain of *TgFtsH1* is sufficient to confer**  
 581 **resistance to actinonin in *T. gondii***

582 (a) Representative images of the apicoplast of control and actinonin treated parasites 36  
 583 hours after infection. Representative parasites missing their apicoplast are denoted with  
 584 white arrows. The apicoplast is visualized using the *T. gondii* reporter strain RH FNR-  
 585 RFP in which RFP is targeted to the apicoplast and the nucleus is stained with Hoescht  
 586 33342. Each untreated parasite contains one apicoplast, except during cell division when  
 587 there may be two.

588 (b) Dose-dependent parasite growth inhibition upon treatment with actinonin for the  
 589 actinonin-sensitive parent strain (RH) compared with 3 independent clones following  
 590 selection for actinonin resistance (resistant 1, resistant 2, resistant 3). These three  
 591 resistant clones are representative of the eight clones submitted for whole genome  
 592 sequencing. Growth was measured via summed areas of the plaques formed during  
 593 plaque assays and normalized to untreated controls. Error bars represent the SEM of two  
 594 biological replicates.

595 (c) Dose-dependent parasite growth inhibition upon treatment with actinonin for  
 596 *TgFtsH1*(WT) compared with *TgFtsH1*(N805S) parasites in RH  $\Delta$ KU80 strain. Data was  
 597 measured and analyzed as in 2b.

598 (d) Schematic of *TgFtsH1*. This protein contains a N-unique region containing a putative  
 599 transmembrane domain, an AAA ATPase domain used for unfolding proteins, a  
 600 peptidase domain with a zinc co-factor in the catalytic site, and a C-unique region. The  
 601 resistance-conferring variant *TgFtsH*(N805S) is found in the peptidase domain near the  
 602 catalytic site.

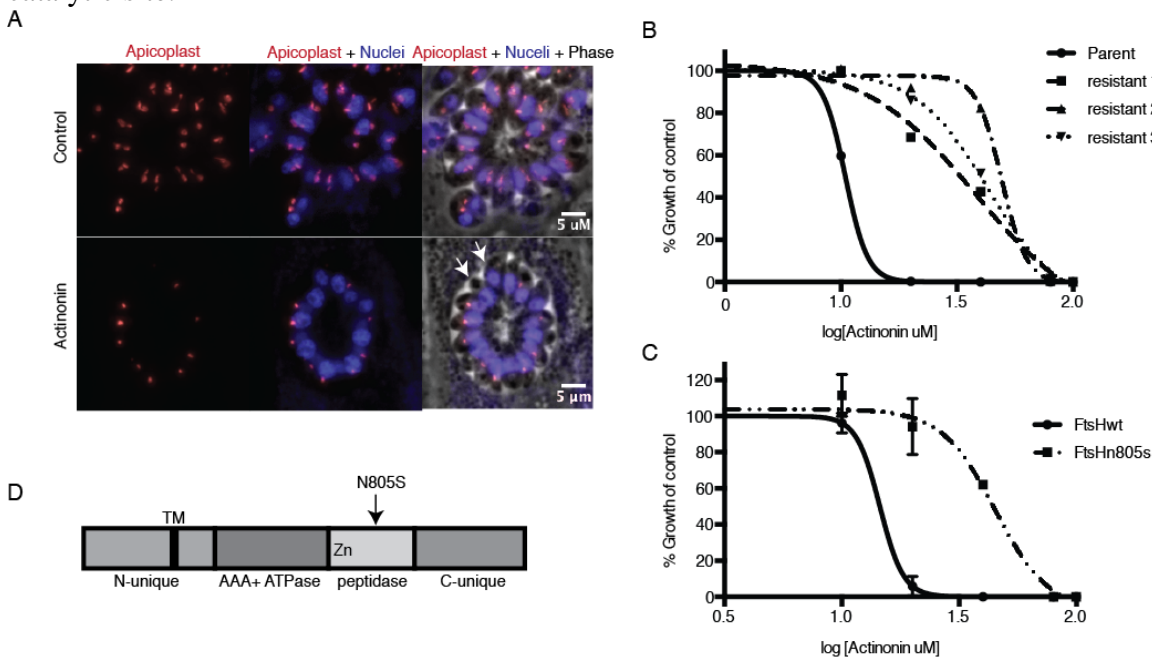

603  
 604

605 **Fig 3: Knockdown of *FtsH1* in *P.***  
606 ***falciparum* leads to apicoplast loss and**  
607 **hypersensitivity to actinonin**  
608 **(a)** Schematic of the endogenous  
609 knockdown strategy. When  
610 anhydrotetracycline (aTC) is present in the  
611 media, the tet-repressor binds aTC and  
612 does not bind the 10x-aptamer sequence,  
613 which relieves translational repression,  
614 allowing *FtsH1* to be expressed. When  
615 aTC is washed out of the media, the tet-  
616 repressor binds the 10x-aptamer and  
617 prevents expression of *FtsH1*.  
618 **(b)** Time course of parasite growth  
619 without aTC and in the presence or  
620 absence of IPP in the media, normalized to  
621 the untreated or IPP-rescued parental  
622 strain as appropriate. Error bars represent  
623 the SEM of two biological replicates.  
624 **(c)** Time course of the apicoplast:nuclear  
625 genome ratio measured by quantitative  
626 PCR (qPCR) using primers for the  
627 apicoplast and nuclear genomes during  
628 treatment with or without aTC. All  
629 samples contained IPP to rescue parasite  
630 growth. Genome ratios were normalized to  
631 respective parental cultures also grown  
632 with IPP. Error bars as in **c**.  
633 **(d)** Dose-dependent parasite growth  
634 inhibition by actinonin in the absence or  
635 presence of aTC. Error bars as in **c**.

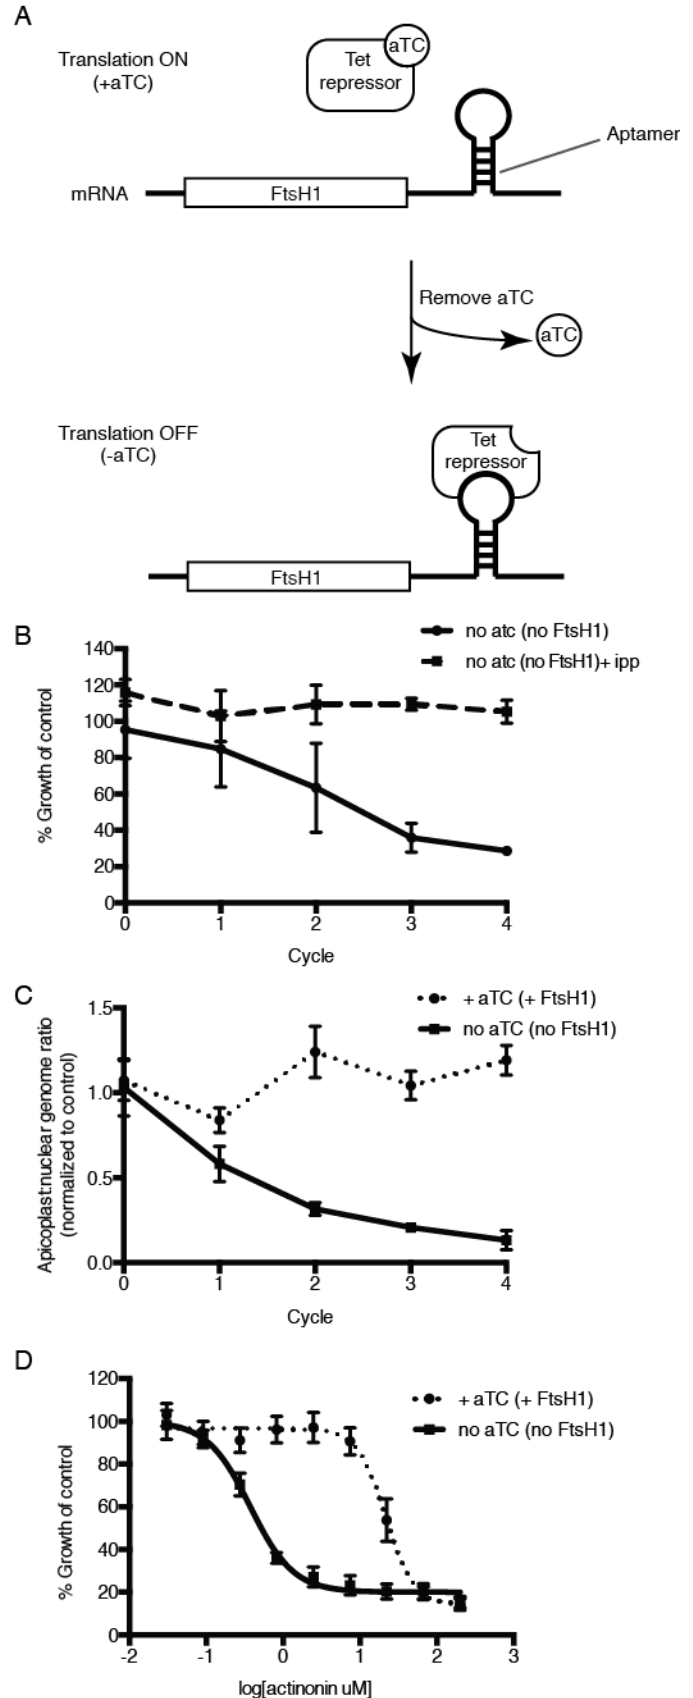

641

642 **Extended Data 1: Actinonin**  
643 **specifically inhibits the apicoplast of**  
644 ***P. falciparum* leading to parasite death**  
645 **after a single replication cycle**

646 **(a)** Dose-dependent parasite growth  
647 inhibition by actinonin in the absence or  
648 presence of IPP. Error bars represent the  
649 standard error of the mean (SEM) of two  
650 biological replicates.

651 **(b)** Time course of parasite growth  
652 during treatment with actinonin,  
653 chloramphenicol, or fosmidomycin in  
654 the absence or presence of IPP. Growth  
655 is normalized to untreated or IPP-  
656 rescued controls as appropriate. Error  
657 bars as in **a**. In contrast to other  
658 antimalarials, which cause growth  
659 inhibition in a single replication cycle,  
660 “delayed death” in *P. falciparum* is  
661 associated with inhibitors of apicoplast  
662 gene expression and has previously been  
663 described in detail<sup>35</sup>. It is characterized  
664 by a normal apicoplast and cell division during drug treatment for one replication cycle,  
665 followed by halted apicoplast and cell division in daughter parasites of drug-treated  
666 parasites.

667

668

669

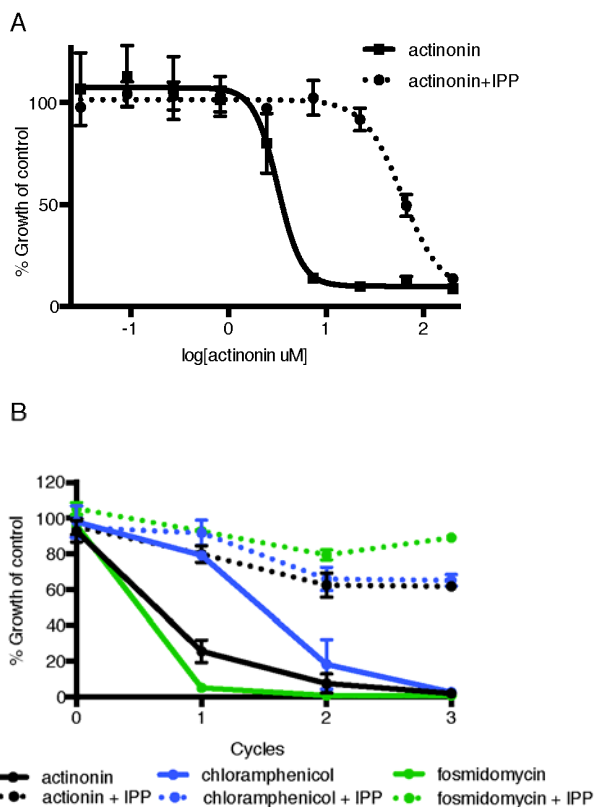

670 **Extended Data Fig 2: Actinonin has a distinct inhibition phenotype compared to**  
671 **inhibitors of apicoplast metabolism and translation**

672 **(a)** Time course of the apicoplast:nuclear genome ratio measured by quantitative PCR  
673 (qPCR) for targets in the apicoplast and nuclear genome during treatment with actinonin  
674 (black), chloramphenicol (blue), or fosmidomycin (green). While actinonin treatment  
675 blocks apicoplast genome replication in a single replication cycle, this effect is not  
676 observed until the second replication cycle of chloramphenicol treatment and not at all  
677 during fosmidomycin treatment. This is consistent with actinonin blocking apicoplast  
678 biogenesis, chloramphenicol blocking apicoplast translation leading to a delayed  
679 apicoplast biogenesis defect, and fosmidomycin blocking apicoplast metabolic function  
680 but not biogenesis. All samples were grown in IPP and genome ratios were normalized to  
681 the untreated control cultures also containing IPP. Error bars represent the SEM of at  
682 least 2 biological replicates.

683 **(b-e)** Representative images of the apicoplast during schizont stage of three successive  
684 replication cycles in untreated **(b)**, chloramphenicol **(c)**, fosmidomycin **(d)** and actinonin  
685 **(e)** treated cultures all grown with IPP. The apicoplast is visualized using the *P.*  
686 *falciparum* reporter strain D10 ACP-GFP in which GFP is targeted to the apicoplast and  
687 the nucleus is stained with Hoescht 33342. In this case, a branched apicoplast indicates  
688 successful apicoplast development while punctate apicoplasts (observed in replication  
689 cycle 1 for actinonin treatment (e) and replication cycle 2 for chloramphenicol treatment  
690 (c)) represents an apicoplast that has failed to develop. The apicoplast is no longer  
691 present after replication cycle 2 of actinonin treatment and upon replication cycle 3 of  
692 chloramphenicol treatment, which leads to complete mislocalization of the GFP.  
693

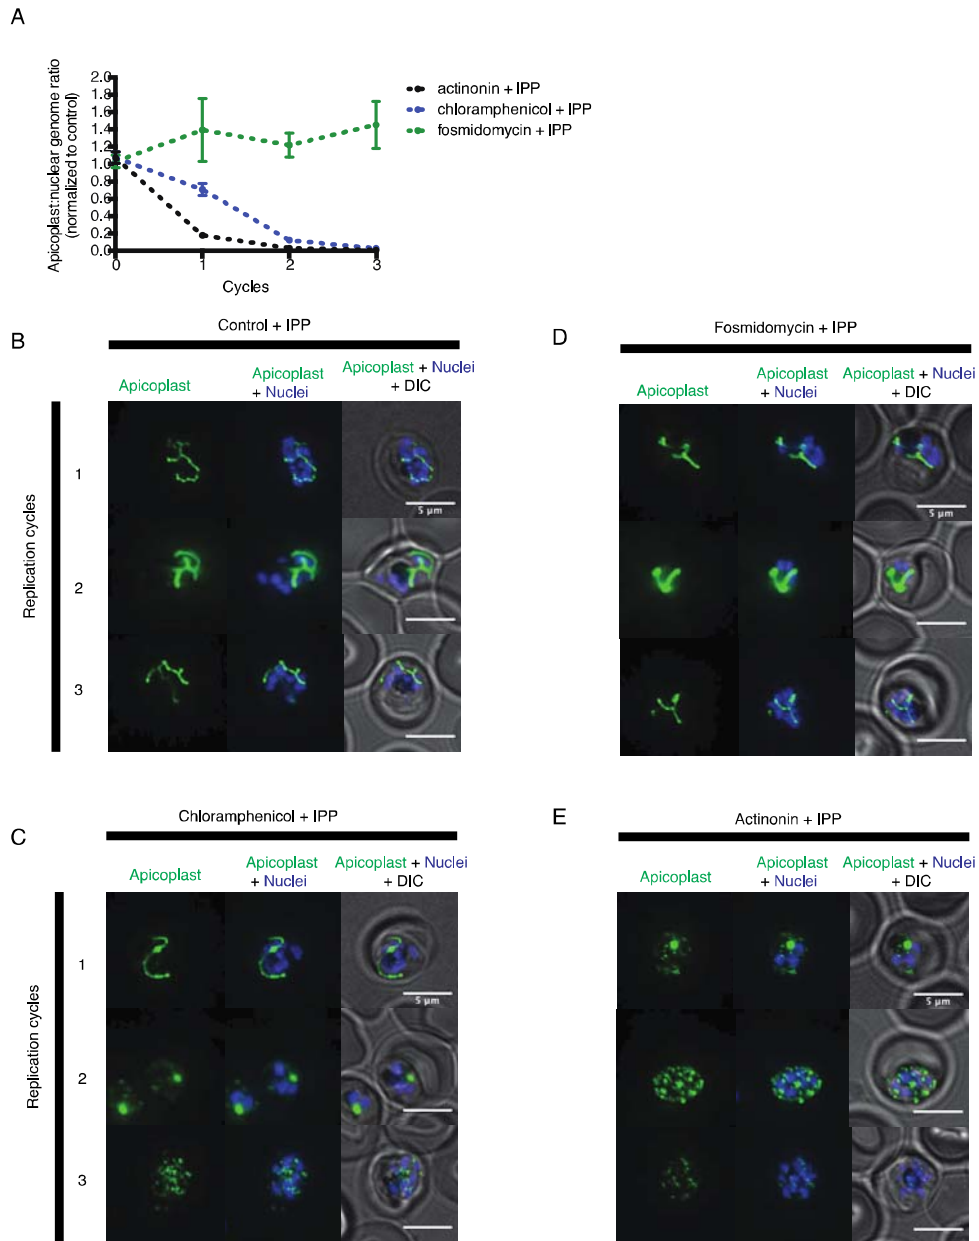

694



695 **Extended Data Fig 3: Growth inhibition in**  
696 **the first replication cycle by actinonin is**  
697 **not suppressed by apicoplast translation**  
698 **inhibition**

699 Parasite growth after one or two replication  
700 cycles after treatment with actinonin,  
701 chloramphenicol, or both actinonin and  
702 chloramphenicol normalized to growth of an untreated control. Treatment with actinonin  
703 alone inhibited growth after the first replication cycle, whereas treatment with  
704 chloramphenicol alone inhibited growth after the second replication cycle. Co-treatment  
705 with chloramphenicol, which targets apicoplast translation, did not suppress effects of  
706 actinonin treatment, which was inconsistent with actinonin targeting the peptide  
707 deformylase (PDF) of the apicoplast.

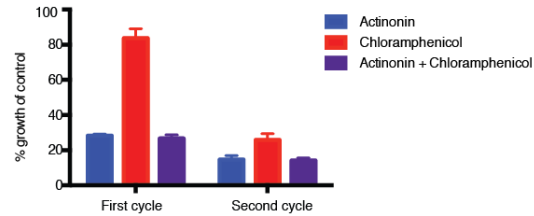

708  
709

710 **Extended Data Fig 4: Actinonin treatment causes “delayed death” in *T. gondii***  
711 **associated with apicoplast loss**

712 Time course of parasite growth of untreated (blue), clindamycin (green), pyrimethamine  
713 (black), or actinonin (red) treated parasites over the course of two lytic cycles. Unlike *P.*  
714 *falciparum*, *T. gondii* undergoes multiple replication cycles in the host cell before lysis,  
715 thus each *T. gondii* lytic cycle represents multiple parasite replication cycles.

716 Pyrimethamine inhibits parasite dihydrofolate reductase and was used as a control for a  
717 non-apicoplast targeting drug that inhibits growth in a single lytic cycle. As previously  
718 reported<sup>34</sup>, clindamycin, an apicoplast translation inhibitor, gave a “delayed death”  
719 phenotype in *T. gondii* characterized by completed cell divisions and host re-invasion  
720 during drug treatment in the first lytic cycle, followed by halted cell division in the  
721 second lytic cycle. Actinonin also led to growth inhibition in the second lytic cycle,  
722 suggesting that it also targets the apicoplast. Error bars represent the SEM of two  
723 biological replicates. It is important to distinguish between apicoplast-associated

724 “delayed death” in *P. falciparum* and  
725 that in *T. gondii*. In *T. gondii*,  
726 apicoplast loss occurs in the first lytic  
727 cycle and is temporally separate from  
728 defects in parasite cell division and  
729 growth inhibition observed in the  
730 second lytic cycle; whereas in *P.*  
731 *falciparum* defects in apicoplast  
732 biogenesis, parasite cell division, and  
733 growth inhibition all occur in the  
734 second replication cycle. “Delayed  
735 death” in *T. gondii* therefore appears  
736 more broadly associated with disruption  
737 of apicoplast biogenesis, where  
738 “delayed death” in *P. falciparum*  
739 appears more specific to disruption of  
740 apicoplast gene expression that leads to  
741 delayed biogenesis defects.

742

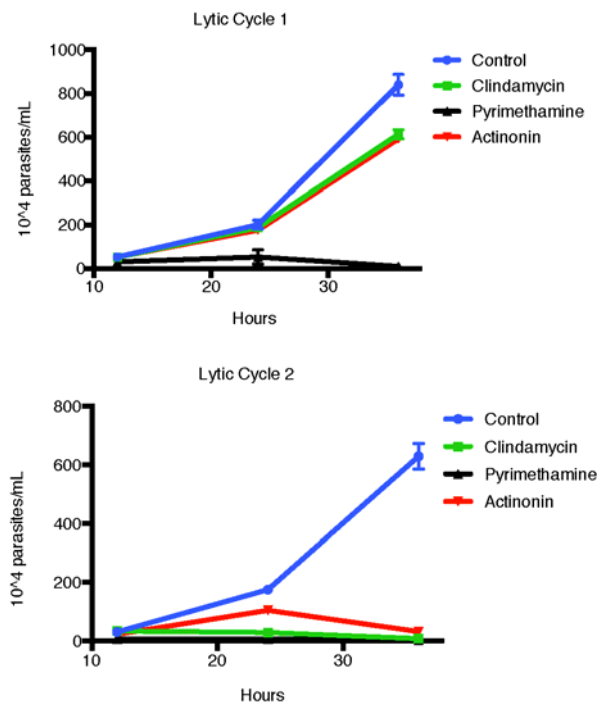

743 **Extended Data Fig 5: Removal of**  
744 **anhydrotetracycline (aTC) from the**  
745 **media results in efficient knockdown**  
746 **of *PfFtsH1*.**

747 Consistent with the previous report of  
748 *PfFtsH1* C-terminal processing, we were  
749 unable to detect full-length *PfFtsH1*-  
750 FLAG using anti-FLAG in parasites with  
751 intact apicoplasts. However, upon loss of the apicoplast, full-length *PfFtsH1*-FLAG was  
752 detectable, suggesting that *PfFtsH1* processing occurs in the apicoplast. Therefore, to  
753 assess the knockdown efficiency of *PfFtsH1*, we used a western blot comparing *PfFtsH1*-  
754 FLAG levels in the presence (lanes 1-4) or absence of aTC (lanes 5-8) in IPP-rescued  
755 parasites missing their apicoplast. Each sample was taken at the trophozoite stage and  
756 cycle 0 indicates 24 hours after the removal of aTC. Lanes 9 and 10 are samples from the  
757 parental strain that do not contain the FLAG-tag or the aptamer sequence in the 3' UTR  
758 of *PfFtsH1*. In each case, Cas9-FLAG was used as a loading control. *PfFtsH1*-FLAG  
759 levels were reduced to undetectable levels at 24 hours after aTC removal, validating our  
760 knockdown strategy.

761  
762  
763

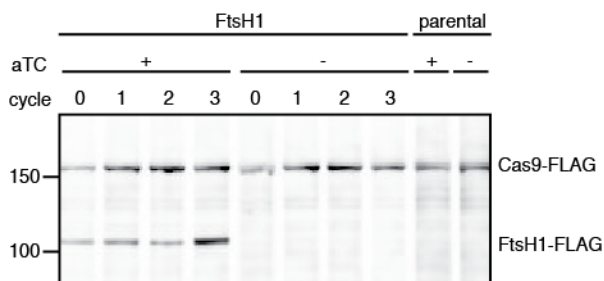

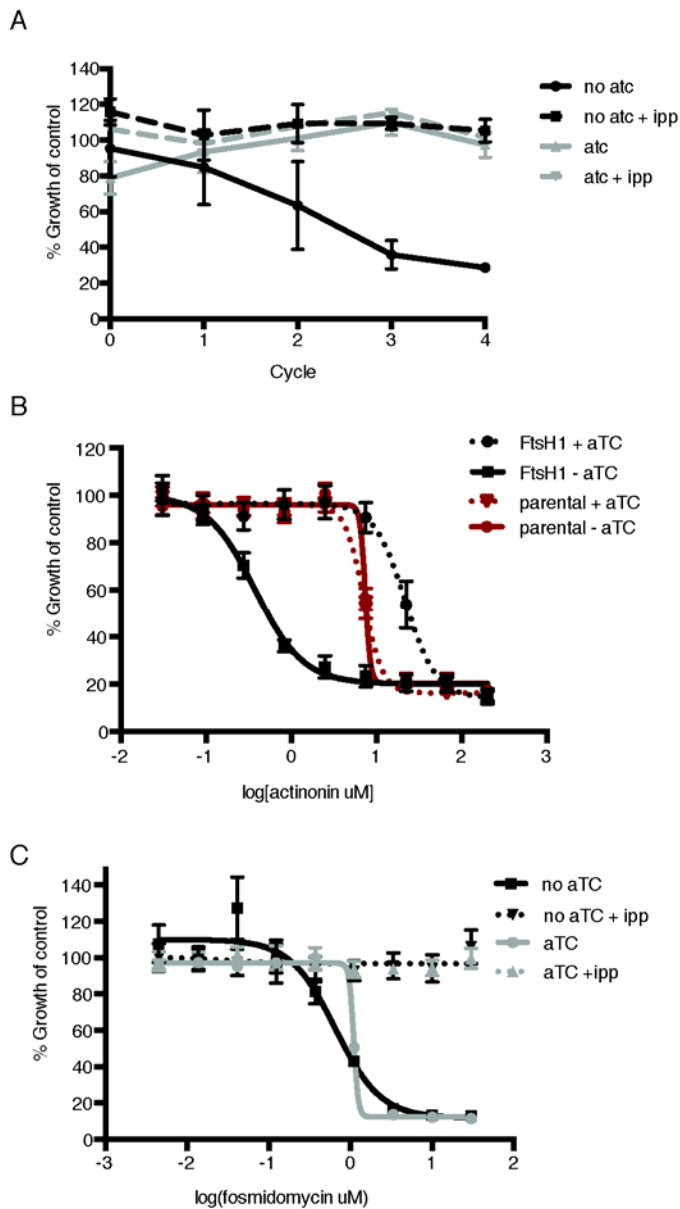

### Extended Data Fig 6: Knockdown of *PfFtsH1* specifically disrupts the apicoplast and leads to specific hypersensitivity to actinonin

(a) Time course of parasite growth with or without anhydrotetracycline (aTC) and with or without IPP in the media. IPP rescues the growth defect observed in upon *PfFtsH1* downregulation, indicating that *PfFtsH1* is essential for an apicoplast-specific function. Growth is shown normalized to the untreated or IPP-rescued parental strain as appropriate. Error bars represent the SEM of two biological replicates.

(b) Dose-dependent parasite growth inhibition by actinonin with or without aTC for the parental (red) and *PfFtsH1* (black) strain. The  $EC_{50}$  of the parental strain is unchanged by the removal of aTC. Error bars as in a.

(c) Dose-dependent parasite growth inhibition by fosmidomycin with or without aTC in and with or without IPP. The fosmidomycin  $EC_{50}$  is unchanged by regulating levels of *PfFtsH1*, indicating that the observed hypersensitivity to actinonin upon knockdown of *PfFtsH1* is specific to actinonin and does not occur for all apicoplast drug. Error bars represent the SEM of three technical replicates.

797
